# Supplementary material for: A novel lysosome-related gene signature coupled with gleason score for prognosis prediction in prostate cancer
Source: Front Genet. 2023 Mar 30;14:1135365. doi: 10.3389/fgene.2023.1135365 (PMC10098196; doi:10.3389/fgene.2023.1135365)
Supplement: Supplementary file 1 [file Table1.XLS]

## Sheet: Sheet1
Supplementary Table S1. The Gene Signatures of 28 Immune-Infiltrating Lymphocytes
Immune-Infiltrating Lymphocytes	Genes
Activated B cell	ADAM28,CD180,CD79B,BLK,CD19,MS4A1,TNFRSF17,IGHM,GNG7,MICAL3,SPIB,HLA-DOB,IGKC,PNOC,FCRL2,BACH2,CR2,TCL1A,AKNA,ARHGAP25,CCL21,CD27,CD38,CLEC17A,CLEC9A,CLECL1
Activated CD4 T cell	AIM2,BIRC3,BRIP1,CCL20,CCL4,CCL5,CCNB1,CCR7,DUSP2,ESCO2,ETS1,EXO1,EXOC6,IARS,ITK,KIF11,KNTC1,NUF2,PRC1,PSAT1,RGS1,RTKN2,SAMSN1,SELL,TRAT1
Activated CD8 T cell	ADRM1,AHSA1,C1GALT1C1,CCT6B,CD37,CD3D,CD3E,CD3G,CD69,CD8A,CETN3,CSE1L,GEMIN6,GNLY,GPT2,GZMA,GZMH,GZMK,IL2RB,LCK,MPZL1,NKG7,PIK3IP1,PTRH2,TIMM13,ZAP70
Central memory CD4 T cell	ABHD3,AHNAK,ANXA2P2,AQP3,ATHL1,BMI1,BZW2,CD63,COL4A1,CYLD,ELMO2,FYN,GLIPR1,GSS,IFITM2,ITGB1,ITGB2,KLF5,LSP1,NDUFB9,PKM2,SFXN3,SIRPG,SMAD4,STX4,TRADD,VIM,XRCC6
Central memory CD8 T cell	ACTN4,ADAM12,ADCY9,F13A1,FCER1G,FCGR3B,FGF7,FKBP4,GLUD1,GM2A,GUSB,IL1RN,NOL11,NTRK1,RARA,RNF128,SIGLEC1,TNFRSF11A,TOX4,UBA52,ULBP1
Effector memeory CD4 T cell	ATM,CASP3,CASQ1,CD300E,DARS,DOCK9,EXOSC9,EZH2,GDE1,IL34,NCOA4,NEFL,PDGFRL,PTGS1,REPS1,SCG2,SDPR,SIGLEC14,SIGLEC6,TAL1,TFEC,TIPIN,TPK1,UQCRB,USP9Y,WIPF1,ZCRB1
Effector memeory CD8 T cell	ACAP1,APOL3,ARHGAP10,ATP10D,C3AR1,CCR5,CD160,CD55,CFLAR,CMKLR1,DAPP1,FCRL6,FLT3LG,GZMM,HAPLN3,HLA-DMB,HLA-DPA1,HLA-DPB1,IFI16,LIME1,LTK,NFKBIA,SETD7,SIK1,TRIB2
Gamma delta T cell	ACP5,AQP9,BTN3A2,C1orf54,CARD8,CCL18,CD209,CD33,CD36,CDK5,IL10RB,KLRF1,LGALS1,MAPK7,KLHL7,KRT80,LAMC1,LCORL,LMNB1,MEIS3P1,MPL,FABP1,FABP5,FADD,MFAP3L,MINPP1,RPS24,RPS7,RPS9,DBNL,CCL13
Immature B cell	CD22,CYBB,FAM129C,FCRL1,FCRL3,FCRL5,FCRLA,HDAC9,HLA-DQA1,HVCN1,KIAA0226,NCF1,NCF1B,P2RY10,SP100,TXNIP,STAP1,TAGAP,ZCCHC2
Memory B cell	AICDA,CCNA2,CDKN3,CLCN5,ENPP1,FCER1A,FCRL4,MYC,RUNX2,SORL1,SOX5,STAT5A,STAT5B,TLR9
Regulatory T cell	CCL3L1,CD72,CLEC5A,FOXP3,ITGA4,L1CAM,LIPA,LRP1,LRRC42,MARCO,MMP12,MNDA,MRC1,MS4A6A,PELO,PLEK,PRSS23,PTGIR,ST8SIA4,STAB1
T follicular helper cell	B3GAT1,CDK5R1,PDCD1,BCL6,CD200,CD83,CD84,FGF2,GPR18,CEBPA,CECR1,CLEC10A,CLEC4A,CSF1R,CTSS,DMN,DPP4,LRRC32,MC5R,MICA,NCAM1,NCR2,NRP1,PDCD1LG2,PDCD6,PRDX1,RAE1,RAET1E,SIGLEC7,SIGLEC9,TYRO3,CHST12,CLIC3,IVNS1ABP,KIR2DL2,LGMN
Type 1 T helper cell	CD70,TBX21,ADAM8,AHCYL2,ALCAM,B3GALNT1,BBS12,BST1,CD151,CD47,CD48,CD52,CD53,CD59,CD6,CD68,CD7,CD96,CFHR3,CHRM3,CLEC7A,COL23A1,COL4A4,COL5A3,DAB1,DLEU7,DOC2B,EMP1,F12,FURIN,GAB3,GATM,GFPT2,GPR25,GREM2,HAVCR1,HSD11B1,HUNK,IGF2,RCSD1,RYR1,SAV1,SELE,SELP,SH3KBP1,SIT 1.00,SLC35B3,SIGLEC10,SKAP1,THUMPD2,TIGIT,ZEB2,ENC1,FAM134B,FBXO30,FCGR2C,STAC,LTC4S,MAN1B1,MDH1,MMD,RGS16,IL12A,P2RX5,CD97,ITGB4,ICAM3,…
Type 17 T helper cell	IL17A,IL17RA,C2CD4A,C2CD4B,CA2,CCDC65,CEACAM3,IL17C,IL17F,IL17RC,IL17RE,IL23A,ILDR1,LONRF3,SH2D6,TNIP2,ABCA1,ABCB1,ADAMTS12,ANK1,ANKRD22,B3GALT2,CAMTA1,CCR9,CD40,GPR44,IFT80
Type 2 T helper cell	ASB2,CSRP2,DAPK1,DLC1,DNAJC12,DUSP6,GNAI1,LAMP3,NRP2,OSBPL1A,PDE4B,PHLDA1,PLA2G4A,RAB27B,RBMS3,RNF125,TMPRSS3,GATA3,BIRC5,CDC25C,CDC7,CENPF,CXCR6,DHFR,EVI5,GSTA4,HELLS,IL26,LAIR2
Activated dendritic cell	ABCD1,C1QC,CAPG,CCL3L3,CD207,CD302,ATP5B,ATP5L,ATP6V1A,BCL2L1,C1QB,SNURF,SPCS3,CCNA1,CEACAM8,NOS2,SRA1,TNFRSF6B,TREM1,TREML1,RHOA,SLC25A37,TNFSF14,TREML4,VNN 2.00,XPO6,CLEC4C,TNFAIP2,UBD,ACTR3,RAB1A,SLA,HLA-DQA2,SIGLEC5,SLAMF9
CD56bright natural killer cell	ABAT,C11orf75,C5orf15,CDHR1,DCAF12,DYNLL1,GPR137B,HCP5,HDGFRP2,KRT86,MLST8,ELMOD3,ENTPD5,FAM119A,FAM179A,CLIC2,COX7A2L,CREB3L4,CSF1,CSNK2A2,CSTA,CSTB,CTPS,CTSD,FST,GATA2,GMPR,HDC,HEY1,HOXA1,HS2ST1,HS3ST1,BCL11B,CDH3,MYL6B,NAA16,ClQA,ClQB,CYP27B1,EIF3M
CD56dim natural killer cell	CYP27A1,DDX55,DYRK2,RPL37A,NOTCH3,AKR7A3,GPRC5C,GRIN1,HLA-E,PORCN,PSMC4,UPP1,IL21R,KIR2DS1,KIR2DS2,KIR2DS5
Eosinophil	GIPR,KRT18P50,LRMP,FOSB,RRP12,GPR183,NR4A3,ST3GAL6,DEPDC5,PDE6C,PKD2L2,GPR65,IL5RA,P2RY14,DACH1,DAPK2,EMR3
Immature dendritic cell	ACADM,AHCYL1,ALDH1A2,ALDH3A2,ALDH9A1,ALOX15,AMT,ARL 1.00,ATIC,ATP5A1,CAPZA1,LILRA5,RDX,RRAGD,TACSTD2,INPP5F,RAB38,PLAU,CSF3R,SLC18A2,AMPD2,CLTB,C1orf162
Macrophage	AIF1,CCL1,CCL14,CCL23,CCL26,CD300LB,CNR1,CNR2,EIF1,EIF4A1,FPR1,FPR2,FRAT2,GPR27,GPR77,RNASE2,MS4A2,BASP1,IGSF6,HK3,VNN 1.00,FES,NPL,FZD2,FAM198B,HNMT,SLC15A3,CD4,TXNDC3,FRMD4A,CRYBB1,HRH1,WNT5B
Mast cell	ADAMTS3,CPA3,CMA1,CTSG,ARHGAP15,CPM,FCN1,FTL,HSPA6,ITGA9,RNASE3,S100A4,SIGLEC8,SLC6A4,PTGS2,EGR3,PILRA
MDSC	CCR2,CD14,CD2,CD86,CXCR4,FCGR2A,FCGR2B,FCGR3A,FERMT3,GPSM3,IL18BP,IL4R,ITGAL,ITGAM,PARVG,PSAP,PTGER2,PTGES2,S100A8,S100A9
Monocyte	ASGR2,CFP,ASGR1,CD1D,UPK3A,ACTG1,ANXA5,ATP6V1B2,CFL1,DAZAP2,CTBS,EMR4P,HIVEP2,MARCKSL1,MBP,MMP15,PNPLA6,TMBIM6,PQBP1,TEX264,IKZF1
Natural killer cell	AKT3,AXL,BST2,CDH2,CRTAM,CSF2RA,CTSZ,CXCL1,CYTH1,DAXX,DGKH,DLL4,DPYD,ERBB3,F11R,FAM27A,FAM49A,FASLG,FCGR1A,FN1,FSTL1,FUCA1,GBP3,GLS2,GRB2,LST1,BCL2,CDC5L,FGF18,FUT5,FZR1,GAGE2,IGFBP5,KANK2,LDB3
Natural killer T cell	BTN2A2,CD101,CD109,CNPY3,CNPY4,CREB1,CRTC2,CRTC3,CSF2,KLRC1,FUT4,ICAM2,IL32,LAMP2,LILRB5,KLRG1,HSPA4,HSPB6,ISM2,ITIH2,KDM4C,KIR2DS4,KIRREL3,SDCBP,NFATC2IP,MICB,KIR2DL1,KIR2DL3,KIR3DL1,KIR3DL2,NCR1,FOSL1,TSLP,SLC7A7,SPP1,TREM2,UBASH3A,YBX2,CCDC88A,CLEC1A,THBD,PDPN,VCAM1,EMR1
Neutrophil	CREB5,CDA,CHST15,S100A12,APOBEC3A,CASP5,MMP25,HAL,C1orf183,FFAR2,MAK,CXCR1,STEAP4,MGAM,BTNL8,CXCR2,TNFRSF10C,VNN 3.00
Plasmacytoid dendritic cell	CBX6,DAB2,DDX17,HIGD1A,IDH3A,IL3RA,MAGED1,NUCB2,OFD1,OGT,PDIA4,SERTAD2,SIRPA,TMED2,ENG,FCAR,IGF1,ITGA2B,GABARAP,GPX1,KRT23,PROK2,RALB,RETNLB,RNF141,SEC14L1,SEPX1,EMP3,CD300LF,ABTB1,KLHL21,PHRF1
