# Supplementary material for: A novel lysosome-related gene signature coupled with gleason score for prognosis prediction in prostate cancer
Source: Front Genet. 2023 Mar 30;14:1135365. doi: 10.3389/fgene.2023.1135365 (PMC10098196; doi:10.3389/fgene.2023.1135365)
Supplement: Supplementary file 3 [file Table2.XLS]

## Sheet: Sheet1
Supplementary Table S2. The lysosome-related Pathways
Lysosome-related Pathways	Genes
BIOCARTA_CBL_PATHWAY	PRKCA,SH3KBP1,MET,EGF,SH3GLB1,GRB2,PRKCB,CBL,CSF1R,EGFR,PDGFRA,SH3GLB2
GOBP_AUTOPHAGOSOME_LYSOSOME_FUSION	TOM1,CLN3,VPS39,ATP13A2,PIP4K2A,ARL8B,RUBCNL,PIP4K2B,PLEKHM1
GOBP_CHAPERONE_MEDIATED_AUTOPHAGY	STUB1,CLU,PLK3,SYNPO2,EEF1A1,EEF1A2,ATP13A2,GFAP,HSPA8,HSP90AA1,LAMP2,CTSA,SNCA,SNRNP70,ATG5,BAG3
GOBP_LATE_ENDOSOME_TO_VACUOLE_TRANSPORT	CHMP4BP1,STAM2,SNF8,CHMP4B,VPS37A,VPS37D,LEPROTL1,TMEM50A,PTPN23,CHMP2B,VPS4A,CHMP2A,CHMP4A,PIK3R4,BECN2,VPS36,VPS28,CHMP1A,UBAP1,CHMP5,VTA1,CHMP3,LEPROT,VPS37C,CHMP1B,TSG101,TMEM50B,CHMP6,VPS37B,STAM,VPS25,BECN1,HGS,CHMP7,CHMP4C,MVB12A,VPS4B
GOBP_LYSOSOMAL_MEMBRANE_ORGANIZATION	CHMP4B,ATP10B,CHMP2B,CHMP2A,CHMP4A,MT3,CHMP1A,CHMP5,CHMP3,LAPTM4B,CHMP1B,LAPTM5,CHMP6,CHMP7,CHMP4C
GOBP_MACROAUTOPHAGY	HDAC6,CHMP4BP1,TOM1,HUWE1,OPTN,RNF41,CDK5,TRIM13,CALCOCO2,STAM2,TCIRG1,NOD1,VTI1B,ATG7,SPTLC1,CERS1,EHMT2,CDC37,WDR45,LZTS1,SNX18,SNF8,VPS26B,PHB2,GABARAP,GABARAPL2,CLN3,LRRK2,SPATA33,WDR81,LIX1L,CHMP4B,VPS37A,UBXN2B,SMCR8,ADPRH,VTI1A,SESN3,EXOC8,CTSD,ADRB2,ATP6V0E2,VPS37D,TMEM74,RETREG3,DCN,UBXN2A,LIX1,SYNPO2,PGAM5,PIKFYVE,C9orf72,AKT1,ERN1.00,ATG14,TRAPPC8,RAB3GAP1,WDFY3,SMG1,ATG2A,ATG4B,TBC1D1…
GOBP_NEUROTRANSMITTER_RECEPTOR_TRANSPORT_POSTSYNAPTIC_ENDOSOME_TO_LYSOSOME	CACNG3,CACNG2,CACNG5,CACNG4,CACNG8,CACNG7,AP3D1
GOBP_PENETRATION_OF_ZONA_PELLUCIDA	B4GALT1,DKKL1,HEXB,SMCP,ACR,PPP3R2,PITHD1,TNP2,HYAL3
GOBP_PROTEIN_TARGETING_TO_LYSOSOME	CLU,ATG14,GGA3,AP3M1,VPS4A,PIK3R4,HSPA8,WASH3P,LAMP2,LHCGR,M6PR,NEDD4,NAGPA,PIK3C3,SORT1,SNX16,SORL1,LAPTM5,RAB7A,GNPTAB,NCOA4,GNPTG,AP3B1,BECN1,HGS,AP4M1,SCARB2,GCC2,ZFYVE16
GOBP_RECEPTOR_INTERNALIZATION	APELA,CALCRL,FLOT1,RAMP2,RAMP1,RAMP3,CACNG3,CACNG2,LILRB1,LILRB4,RAB31,AP2M1,AP2S1,CLTC,ANKRD13B,ADM,GSG1L,GRK2,GRK3,AP2A1,AP2A2,AP2B1,DLG4,DNM1,DNM2,DRD2,DRD3,DRD4,EFNB2,EGF,FCER1G,DKK 1.00,ARC,FMR1,SCRIB,PCSK9,LRRTM2,DNM3,LDLRAP1,GREM1,GH1,CACNG5,CACNG4,ANGPT1,RSPO1,GRK4,GRB2,GRIA1,GTF2H2,UBQLN2,ANXA2,HPCA,HTR1B,HTR2B,ANKRD13D,LRRTM1,CXCL8,CXCR1,CXCR2,INSR,ITGB1,ITGB2,ITGB3,ARF1,LRP1,LRPAP1,MIR…
GOBP_REGULATION_OF_LYSOSOME_ORGANIZATION	TREX1,GRN,TMEM106B,LAPTM4B,BECN1,SCARB2
GOBP_XENOPHAGY	OPTN,CALCOCO2,NOD1,WIPI2,TBK1,LGALS8,ATG16L1,RNF31,MAPK3,RNF213,NOD2,RIPK2,LRSAM1
GOCC_ACROSOMAL_MEMBRANE	ZPBP,SPACA3,SPACA6,TMEM190,ATP8B3,VPS13B,FAM170B,FLOT2,CFAP65,IZUMO1,TMEM225,TMEM95,CD46,MFGE8,SERPINA5,PLA1A,EQTN,PCSK4,RAB6A,TEKT3,CCDC136,BSG,RND2,SPACA1,TEX101,HYAL3,ACRBP,CAV1,CAV2,TRIP11
GOCC_AUTOLYSOSOME	CLN3,LRRK2,FTH1,FTL,GAA,LAMP1,LAMP2,PIK3C3,NCOA4,MAP1LC3A,SQSTM1,PLEKHM1
GOCC_BORC_COMPLEX	BORCS5,BORCS7,SNAPIN,BLOC1S1,BLOC1S2,BORCS6,BORCS8,KXD1
GOCC_CYTOLYTIC_GRANULE	GNLY,RNF19B,SERPINB1,GZMH,GZMB,LAMP1,NKG7,ARL8B,PRF1,SRGN,STXBP2,TIAL1,CALR
GOCC_INTEGRAL_COMPONENT_OF_LYSOSOMAL_MEMBRANE	SLC15A4,SLC38A9,SPAAR,ATP10B,ATP13A2,SLC46A3,NPC1,LRRC8A,LRRC8E,TMEM175
GOCC_SECONDARY_LYSOSOME	ADAM8,CLN3,LRRK2,CRHBP,FTH1,FTL,GAA,LAMP1,LAMP2,NCF2,NCF4,PIK3C3,PLA2G5,NCF1,NCOA4,MAP1LC3A,SQSTM1,PLEKHM1
KEGG_ENDOCYTOSIS	PDCD6IP,DNM1L,RNF41,STAM2,STAMBP,EHD1,RAB31,WWP1,SNF8,VPS45,ACAP3,ARAP2,ARAP1,AGAP2,AGAP1,AP2M1,AP2S1,CLTA,CLTB,CLTC,CCR5,CHMP4B,GRK7,VPS37A,CSF1R,ADRB1,ADRB2,ADRB3,VPS37D,GRK2,GRK3,AP2A1,DAB2,AP2A2,AP2B1,DNM1,DNM2,EGF,EGFR,PIKFYVE,EPS15,ERBB3,ERBB4,F2R,FGFR3,FGFR2,FGFR4,RAB11FIP2,EPN2,IQSEC2,FLT1,NEDD4L,PSD3,PIP5K1C,ACAP2,PSD4,CBLC,CHMP2B,DNM3,RAB11FIP5,LDLRAP1,ARFGAP3,VPS4A,CHMP2A,GRK4,GRK5,GRK…
KEGG_LYSOSOME	AP1M2,AP3S2,TCIRG1,NPC2,AP4B1,CTSC,AP3M2,AP4S1,AP1S1,AP3S1,TPP1,CLN3,CLN5,CLTA,CLTB,CLTC,AP1S3,HGSNAT,CTNS,CTSB,CTSD,CTSE,CTSG,CTSH,CTSK,CTSL,CTSV,CTSO,CTSS,CTSW,CTSZ,AP1B1,AP1G1,AGA,DNASE2,ABCA2,ARSG,GGA2,GGA3,AP4E1,ABCB9,ATP6V0A2,PLA2G15,ATP6V0D2,FUCA1,GAA,MFSD8,GALC,GALNS,GGA1,GBA,SLC17A5,AP3M1,LAMP3,GLA,GLB1,GM2A,GNS,SUMF1,GUSB,HEXA,HEXB,HYAL1,IDS,IDUA,IGF2R,LAMP1,LAMP2,LIPA,M6PR,ARSA,ARSB,MA…
LYSOSOMAL_MEMBRANE	ABCA2,CD63,CLN5,CORO1A,CTNS,LAMP2,LAMP3,MYO7A,SLC17A5,TRIM23
LYSOSOME	ABCA2,ACR,ADRB2,ANKRD27,AP3M1,ARSB,AZU1,BCL10,KNL1,CD63,CLN5,CORO1A,CTNS,CTSC,CTSF,CYLC1,DNASE2,GALC,GLA,HLA-DOB,HLA-DRA,HPS1,HPS4,HYAL2,IFI30,CXCR2,KCNE1,KCNE2,LAMP2,LAMP3,LIPA,LRP2,MPO,MYO7A,NAGLU,NEU4,NPC2,PPT1,RAB14,RAB7A,RAB9A,RAMP2,RAMP3,SFTPD,SLC17A5,SPACA3,SRGN,STS,TIAL1,TOM1,TOM1L1,TPP1,TRIM23,TSPAN8,TYR,USE1,USP4,USP5,USP6,VAMP4,VPS45
REACTOME_LYSOSOME_VESICLE_BIOGENESIS	M6PR,AP1M1,DNM2,AP4E1,AP1B1,AP4S1,CTSZ,DNASE2,AP1S1,SH3GL2,HSPA8,DNAJC6,VAMP8,CLTA,VAMP7,AP1M2,CHMP2A,AP4B1,BLOC1S1,GNS,ARRB1,CLTC,APP,ARF1,CLVS2,AP1S3,AP1G1,CLTB,CLVS1,AP1S2,HGS,AP1G2,VAMP2,AP4M1,TXNDC5
